# Supplementary material
Source: Springer Nature journal article supplement (https://www.springerprofessional.de/resource/supplementary/13673_2013_37_MOESM1_ESM.pdf/11899364)
Supplement: MOESM1 [file 11899364]

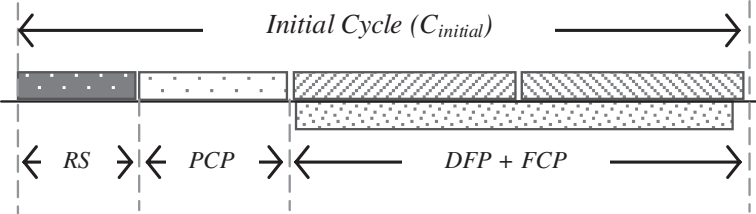

■ : Random Sensing

□ : Preliminary Clustering Phase

▨ : Local Data Fusion Phase

▩ : Global Data Fusion Phase

▧ : Final Clustering Phase
